# Supplementary material for: Retrospective validation of bone risk stratification criteria for men with de novo metastatic hormone-naive prostate cancer in China
Source: PeerJ. 2023 Jan 4;11:e14500. doi: 10.7717/peerj.14500 (PMC9825052; doi:10.7717/peerj.14500)
Supplement: Data S1 [file peerj-11-14500-s003.xlsx]

## Sheet: Base value
Number	Age	TPSA	HB	ALP	FIB	Visceral metastasis	eod	H/LVD	cT	Gleason	H/LRD	EBM	OS（months)	Censor	CRPCcensor	Time to CRPC（months)
1	82	83.34	122	321	5.06	No	4	High	4	9	High	Yes	9	1	1	4
2	72	595.2	132	151	4.63	No	4	High	4	8	High	Yes	25	1	1	16
3	73	>100	134	91	3.66	No	2	High	3	8	High	No	40	0	1	37
4	70	65	124	147	4.92	No	2	High	2	7	Low	No	9	1	0	9
5	56	1118	124	568	4.23	No	4	High	4	9	High	Yes	14	0	1	5
6	63	101.2	126	1432	—	No	3	High	3	9	High	Yes	18	0	1	14
7	66	68.72	122	85	2.35	No	2	High	3	8	High	No	27	0	1	21
8	83	>100	122	96	2.767	No	2	High	1	6	Low	Yes	52	0	1	28
9	66	183.3	132	285	4.89	No	4	High	4	9	High	Yes	22	0	1	4
10	70	49.93	137	111	6.16	No	2	High	4	10	High	Yes	18	0	1	12
11	74	721.3	130	174	3.36	No	2	High	2	7	Low	Yes	22	0	1	4
12	82	21.18	159	72	2.97	No	1	High	1	9	High	No	39	0	1	15
13	75	0.09	107	171	6.96	No	2	High	2	9	High	Yes	55	1	1	21
14	78	247.6	103	67	3.02	No	1	Low	1	8	Low	No	11	0	0	11
15	72	18.22	134	41	4.285	No	1	Low	2	8	High	No	95	0	1	50
16	67	97.21	142	86	2.235	No	1	Low	2	7	Low	No	77	0	1	46
17	80	404.6	125	549	-	No	3	High	2	8	High	Yes	13	1	1	11
18	52	>154	136	164	2.452	No	4	High	4	8	High	Yes	35	1	1	12
19	73	18.55	127	248	7.59	No	4	High	4	8	High	Yes	26	0	1	17
20	65	>100	136	98	4.98	No	2	High	3	8	High	No	42	1	1	11
21	80	86.79	146	28	2.53	Yes	1	High	4	10	High	Yes	21	0	1	11
22	77	228.6	133	92	6.6	No	1	Low	3	9	Low	No	16	1	1	4
23	66	2232	134	130	5.06	No	2	High	2	7	Low	Yes	18	0	0	18
24	65	998.757	137	105	4.485	No	1	Low	4	8	Low	Yes	51	0	0	51
25	80	345.7	133	165	3.27	No	2	Low	4	6	Low	No	53	1	1	26
26	66	59.8	125	704	4.28	No	3	High	2	9	High	Yes	32	1	1	3
27	74	163.9	99	105	—	No	2	High	3	9	High	No	20	0	0	20
28	73	315.3	81	411	3.57	No	4	High	3	8	High	Yes	2	1	0	2
29	54	441.3	143	1124	2.91	No	3	High	4	8	High	Yes	14	0	0	14
30	84	7125	113	175	4.004	No	4	High	2	9	High	Yes	27	1	1	26
31	66	650.6	128	125	4.91	No	2	High	4	9	High	Yes	3	1	1	2
32	77	>100	137	66	2.71	No	3	High	2	7	Low	Yes	41	0	1	7
33	80	2788.6	145	799	5.46	No	4	High	3	9	High	Yes	14	0	1	9
34	48	>100	151	52	3.786	No	3	High	3	7	Low	Yes	7	0	0	7
35	62	>100	141	91	2.28	No	2	High	2	7	Low	No	17	0	0	17
36	84	1830	148	1840	1.79	No	4	High	2	7	Low	Yes	40	0	1	2
37	85	10.46	114	69	2.49	No	2	High	4	8	High	Yes	22	1	1	19
38	68	601	133	283	3	No	4	High	3	7	Low	Yes	9	0	1	5
39	82	15.02	130	104	3.423	No	1	High	2	8	High	Yes	82	0	1	9
40	62	71.88	143	68	2.31	No	2	High	2	9	High	Yes	33	0	0	33
41	71	381.2	152	330	3.23	Yes	2	High	2	8	High	No	13	0	0	13
42	61	375.6	138	124	3.78	No	2	High	4	8	High	Yes	26	1	0	26
43	71	71.89	143	64	2.46	No	1	Low	4	9	Low	No	39	0	1	27
44	80	15.97	106	888	6.21	No	4	High	2	9	High	Yes	36	0	0	36
45	67	18.63	142	64	3.591	No	1	High	4	9	High	Yes	71	0	1	28
46	68	1030	123	319	4.61	No	4	High	3	9	High	Yes	35	1	1	29
47	66	3998	134	64	2.9	No	2	High	3	7	Low	No	11	0	0	11
48	84	126.6	117	105	2.97	No	1	Low	4	8	High	No	27	0	0	27
49	72	268	133	290	4.38	No	3	High	2	8	High	Yes	65	1	1	45
50	71	>100	139	63	2.97	No	1	Low	2	7	Low	No	42	0	0	42
51	69	79.25	109	195	4.82	No	3	High	3	7	Low	Yes	9	1	1	6
52	62	889.9	129	83	3.256	No	2	High	3	8	High	Yes	53	0	1	13
53	57	>100	134	41	3.82	No	1	Low	2	7	Low	No	24	0	1	10
54	66	73.84	134	66	2.37	No	2	High	2	9	High	Yes	12	0	1	4
55	57	>100	137	80	2.22	No	2	High	2	8	High	Yes	23	0	0	23
56	61	30.58	142	76	4.15	No	1	High	4	8	High	No	29	0	1	11
57	66	338.8	132	307	4.37	No	3	High	3	8	High	Yes	31	1	1	30
58	74	1501	92	223	3.895	No	4	High	3	7	Low	Yes	25	1	1	8
59	83	59.67	150	47	6.41	No	1	Low	3	8	High	No	14	0	0	14
60	78	2067	108	3301	-	No	4	High	2	7	Low	Yes	40	1	1	7
61	61	20.3	137	72	4.818	No	1	Low	3	8	High	No	28	1	1	3
62	80	33.8	119	62	3.742	No	1	Low	3	7	Low	No	9	1	0	9
63	69	299.7	107	294	5.11	No	4	High	4	8	High	Yes	7	0	1	5
64	79	104.8	120	612	6.03	No	4	High	2	9	High	Yes	12	1	1	9
65	67	3250.3	128	483	6.14	No	4	High	2	9	High	Yes	30	1	0	30
66	75	1006.3	77	273	4.81	No	4	High	1	8	High	Yes	29	1	1	7
67	64	＞100	149	77	2.97	No	1	Low	2	7	Low	No	38	0	1	13
68	73	138.2	144	141	3.27	No	1	Low	2	7	Low	No	38	1	1	35
69	75	723.5	132	797	3.56	No	3	High	2	8	High	Yes	45	1	1	16
70	76	689	121	78	4.239	No	3	High	2	9	High	Yes	58	0	0	58
71	70	144.6	143	73	4.98	No	1	Low	4	8	High	No	27	1	1	11
72	78	16.83	137	51	2.34	No	1	Low	3	8	Low	Yes	14	0	0	14
73	79	＞100	110	1539	—	No	4	High	2	8	High	Yes	44	0	1	11
74	74	406.1	88	209	4	No	3	High	3	10	High	Yes	17	0	1	14
75	63	1182	130	159	4.01	Yes	3	High	4	8	High	Yes	14	0	1	3
76	74	112.2	79	213	4.91	No	3	High	2	7	Low	Yes	45	0	1	5
77	62	＞100	141	595	3.87	No	3	High	3	7	Low	Yes	14	0	0	14
78	58	＞100	105	488	4.526	No	4	High	4	9	High	Yes	32	1	1	16
79	65	1235	74	1539	3.49	No	4	High	2	9	High	Yes	19	1	0	19
80	77	450.64	127	365	3.02	No	4	High	1	8	High	Yes	32	0	1	15
81	81	778.4	101	109	4.669	No	4	High	2	10	High	Yes	21	0	1	10
82	78	53.05	124	96	3.423	No	1	Low	4	8	High	No	82	0	0	82
83	81	＞100	112	149	2.51	No	2	High	2	7	Low	Yes	37	0	0	37
84	73	＞100	103	279	5.49	No	3	High	2	7	Low	Yes	13	1	0	13
85	87	＞100	122	338	—	No	4	High	4	8	High	Yes	8	1	1	7
86	69	42.9	135	153	4.71	Yes	2	High	3	9	High	No	7	0	1	5
87	65	55.66	140	215	2.95	Yes	2	High	2	9	High	No	45	1	1	21
88	89	1862	118	188	3.56	No	2	High	4	8	High	Yes	26	0	1	3
89	71	＞100	119	492	2.68	No	4	High	4	8	High	Yes	14	0	1	10
90	67	60.32	158	60	3.08	No	1	Low	3	7	Low	No	42	1	1	10
91	69	770	53	907	4.94	No	3	High	2	9	High	Yes	8	1	0	8
92	69	18.33	102	79	4	No	1	High	4	8	High	Yes	20	0	1	12
93	64	52.16	158	65	2.36	No	1	Low	2	9	High	No	8	0	1	7
94	80	719.5	116	382	6.16	No	3	High	4	8	High	Yes	20	0	0	20
95	70	1369.5	130	70	—	No	2	High	2	8	High	No	31	0	0	31
96	74	2806.1	106	110	3.87	No	3	High	4	8	High	Yes	14	0	0	14
97	69	＞154	133	505	4.1	No	3	High	4	7	Low	Yes	45	1	1	10
98	70	37.91	139	410	6.47	No	4	High	2	7	Low	Yes	6	1	1	3
99	72	＞100	91	2732	4	No	4	High	2	8	High	Yes	39	1	1	11
100	73	＞100	123	63	—	No	2	High	1	8	High	Yes	13	0	0	13
101	80	＞150	100	103	8.37	No	3	High	3	6	Low	Yes	22	1	1	18
102	59	189.8	130	209	3.86	No	3	High	4	8	High	Yes	16	0	1	14
103	78	20.15	57	989	3.84	No	2	High	2	9	High	Yes	14	1	0	14
104	78	>100	146	95	2.82	No	1	High	4	9	High	No	22	0	0	22
105	67	407.5	126	111	2.918	No	2	High	3	7	Low	Yes	34	1	1	9
106	77	59.87	121	530	5.49	No	4	High	2	7	Low	Yes	23	0	1	23
107	85	140.3	125	50	3.92	No	1	Low	2	7	Low	No	53	0	1	14
108	87	183.6	93	109	3.63	No	1	Low	2	8	High	No	17	0	0	17
109	77	＞154	95	81	3.76	No	1	Low	3	7	Low	No	70	1	0	70
110	61	157.9	114	70	8.019	No	3	High	4	6	Low	Yes	62	0	1	14
111	62	＞100	122	338	—	No	3	High	2	9	High	Yes	44	0	1	42
112	54	460	135	2698	2.7	No	3	High	1	6	Low	Yes	12	0	1	9
113	74	1982	71	211	4.6	No	4	High	2	9	High	Yes	18	0	1	12
114	77	79.73	129	74	2.39	No	1	Low	4	9	High	No	25	1	0	25
115	74	53.5	115	78	4.01	No	2	High	1	9	High	Yes	14	1	1	2
116	62	＞100	121	240	2.31	No	2	High	3	8	High	Yes	25	0	1	9
117	71	1332	93	2261	4.94	No	4	High	4	9	High	Yes	14	1	1	5
118	83	708.4	122	338	—	No	1	Low	4	8	Low	No	16	0	0	16
119	76	145.7	111	86	—	No	2	High	3	8	High	No	36	1	0	36
120	59	＞100	107	177	8.45	No	2	High	2	7	Low	Yes	16	0	1	7
121	74	30.2	124	573	—	No	3	High	2	9	High	Yes	14	1	1	11
122	76	223.4	122	67	5.91	No	1	Low	2	9	Low	No	20	0	1	8
123	81	16.31	81	90	2.85	No	1	Low	4	8	Low	No	13	0	0	13
124	73	81.01	154	64	6.06	No	2	High	2	7	Low	No	37	1	1	29
125	91	244.4	119	373	2.53	No	4	High	2	9	High	Yes	14	0	1	9
126	83	56.52	126	90	3.67	No	2	High	4	9	High	Yes	29	1	1	19
127	65	148.4	139	94	3.36	Yes	1	High	3	8	High	No	38	0	0	38
128	68	＞154	160	97	3.485	No	2	High	3	8	High	No	52	1	1	11
129	70	＞100	125	92	4.77	No	2	High	1	7	Low	No	18	1	1	9
130	63	99.14	108	83	3.94	No	2	High	4	9	High	No	44	1	1	25
131	76	493.8	113	243	4.818	No	2	High	3	8	High	Yes	46	0	1	9
132	80	158.8	118	234	3.81	Yes	3	High	2	9	High	Yes	26	1	0	26
133	62	1352.3	122	338	4.94	No	2	High	4	9	High	Yes	61	1	1	44
134	87	91.14	121	58	2.38	No	1	Low	2	9	Low	No	14	0	0	14
135	72	147.2	71	1500	4.32	No	4	High	2	9	High	Yes	7	1	0	7
136	68	＞100	122	338	—	No	3	High	2	8	High	Yes	29	0	0	29
137	75	＞100	114	84	5.28	No	2	Low	3	8	High	No	31	0	0	31
138	69	47.27	144	55	4.606	Yes	1	High	4	5	High	No	17	1	0	17
139	89	442.4	128	87	—	No	2	High	4	9	High	Yes	17	0	1	12
140	74	866	116	163	—	Yes	3	High	2	8	High	Yes	34	0	0	34
